# Supplementary material for: Advances in the pathogenesis of psoriasis: from keratinocyte perspective
Source: PubMed Central journal article supplement (PMC8786887; doi:10.1038/s41419-022-04523-3), 2022-01-24
Supplement: 41419_2022_4523_MOESM1_ESM.pdf [file 41419_2022_4523_MOESM1_ESM.pdf]

Please complete the table below to indicate the contributions of all named authors to the figures.

Figure 1:

In Figure 1, Xue Zhou and Youdong Chen designed the layout and finished the drawing of the figure, Lian Cui improved the details of the figure.

Figure 2:

In Figure 2, Xue Zhou and Chunyuan Guo designed the layout and finished the drawing of the figure, Youdong Chen improved the details of the figure.

Figure 3:

In Figure 3, Xue Zhou and Yuling Shi designed the layout and finished the drawing of the figure, Lian Cui improved the details of the figure.

Figure 4:

Empty box for Figure 4 description.

Figure 5:

Empty box for Figure 5 description.

Figure 6:

Empty box for Figure 6 description.

Signed for and on behalf of the Author(s):

Print Name:

Date: \*



Chunyuan Guo

12/12/2021
